# Supplementary material
Source: publisher site journal article supplement (https://www.dovepress.com/article/336670)

**Online Supplemental Material**

Reference equations for assessing the physical activity of chronic obstructive pulmonary disease

*Yoshiaki Minakata, Seigo Sasaki, Yuichiro Azuma, Kazumi Kawabe, Hideya Ono*

**Table S1. Simple regression analysis results with transformed PA values.**

|  | Duration at  ≥2.0 METs | | Duration at  ≥3.0 METs | | Total activity  at ≥3.0 METs | | Step count | |
| --- | --- | --- | --- | --- | --- | --- | --- | --- |
|  | r | p | r | p | r | p | r | p |
| Age (years) | -0.106 | 0.112 | -0.157 | 0.018 | -0.160 | 0.016 | -0.184 | 0.005 |
| Gender [M/F] | -0.145 | 0.029 | -0.083 | 0.214 | -0.080 | 0.232 | -0.018 | 0.788 |
| Height (cm) | -0.142 | 0.033 | -0.037 | 0.582 | -0.031 | 0.644 | 0.068 | 0.305 |
| Weight (kg) | 0.019 | 0.774 | 0.114 | 0.087 | 0.117 | 0.078 | 0.063 | 0.344 |
| BMI (kg/m2) | 0.111 | 0.096 | 0.158 | 0.017 | 0.158 | 0.017 | 0.048 | 0.476 |
| Smoking [non/ex/curr] | -0.099 | 0.137 | -0.062 | 0.351 | -0.061 | 0.358 | -0.029 | 0.667 |
| Smoking (Pack·Year) | -0.080 | 0.233 | -0.024 | 0.725 | -0.020 | 0.764 | 0.046 | 0.492 |
| IC (L) | 0.154 | 0.020 | 0.241 | <0.001 | 0.246 | <0.001 | 0.207 | 0.002 |
| FVC %pred (%) | 0.216 | 0.001 | 0.281 | <0.001 | 0.282 | <0.001 | 0.260 | <0.001 |
| FEV1/FVC | 0.319 | <0.001 | 0.359 | <0.001 | 0.360 | <0.001 | 0.289 | <0.001 |
| FEV1 %pred (%) | 0.360 | <0.001 | 0.425 | <0.001 | 0.425 | <0.001 | 0.360 | <0.001 |
| 6MWD (m) | 0.288 | <0.001 | 0.432 | <0.001 | 0.433 | <0.001 | 0.423 | <0.001 |
| Lowest SpO2 during 6-minute walk test (%) | 0.160 | 0.016 | 0.199 | 0.003 | 0.201 | 0.002 | 0.172 | 0.010 |
| Upper arm circumference (cm) | 0.138 | 0.037 | 0.170 | 0.010 | 0.170 | 0.011 | 0.105 | 0.116 |
| Subcutaneous fat thickness of triceps brachii (cm) | -0.008 | 0.908 | -0.043 | 0.516 | -0.042 | 0.531 | -0.141 | 0.034 |
| Grip strength (kgf) | 0.113 | 0.091 | 0.142 | 0.032 | 0.141 | 0.034 | 0.143 | 0.031 |
| Fasting plasma glucose (mg/dL) | -0.028 | 0.672 | 0.060 | 0.369 | 0.076 | 0.257 | -0.027 | 0.684 |
| Hemoglobin A1c (%) | -0.025 | 0.705 | 0.021 | 0.756 | 0.034 | 0.606 | -0.029 | 0.663 |
| Red blood cells (×104/mL) | -0.033 | 0.624 | -0.040 | 0.551 | -0.037 | 0.577 | -0.058 | 0.386 |
| Hemoglobin (g/dL) | -0.090 | 0.177 | -0.049 | 0.467 | -0.046 | 0.491 | -0.052 | 0.436 |
| Brain Natriuretic Peptide (pg/mL) | -0.054 | 0.415 | -0.131 | 0.049 | -0.138 | 0.038 | -0.034 | 0.612 |
| Albumin (g/dL) | 0.117 | 0.080 | 0.123 | 0.065 | 0.123 | 0.064 | 0.107 | 0.109 |
| Anxiety score of HADS | 0.172 | 0.009 | 0.145 | 0.029 | 0.146 | 0.028 | 0.129 | 0.053 |
| Depression score of HADS | -0.053 | 0.430 | -0.079 | 0.237 | -0.082 | 0.219 | -0.056 | 0.400 |
| mMRC | -0.334 | <0.001 | -0.446 | <0.001 | -0.442 | <0.001 | -0.377 | <0.001 |
| Treatment [yes/no] | -0.166 | 0.012 | -0.217 | 0.001 | -0.216 | 0.001 | -0.206 | 0.002 |
| Rehabilitation [yes/no] | -0.112 | 0.094 | -0.080 | 0.232 | -0.087 | 0.193 | 0.035 | 0.602 |
| Comorbidity [yes/no] | -0.006 | 0.931 | -0.004 | 0.952 | -0.001 | 0.990 | -0.029 | 0.660 |

BMI, body mass index; LAMA, long-acting muscarinic antagonist; LABA, long-acting beta 2 adrenergic agonist; ICS, inhaled corticosteroid; Theo, theophylline; Muco, mucolytic agent; IC, inspiratory capacity; FVC, forced vital capacity; FEV1, forced expiratory volume in 1 second; %pred, % of predicted value; 6MWD, 6-minute walk distance; HADS, Hospital Anxiety and Depression Scale; mMRC, modified Medical Research Council, METs, metabolic equivalents.

**Figure legends**

**Figure S1. Histograms of PA.** A: duration at ≥2.0 METs, B: duration at ≥3.0 METs, C: total activity at ≥3.0 METs, D: Step count. METs, metabolic equivalents

**Figure S2. Histograms of transformed PA values.** A: duration at ≥2.0 METs, B: duration at ≥3.0 METs, C: total activity at ≥3.0 METs, D: Step count. METs, metabolic equivalents

**Figure S1**


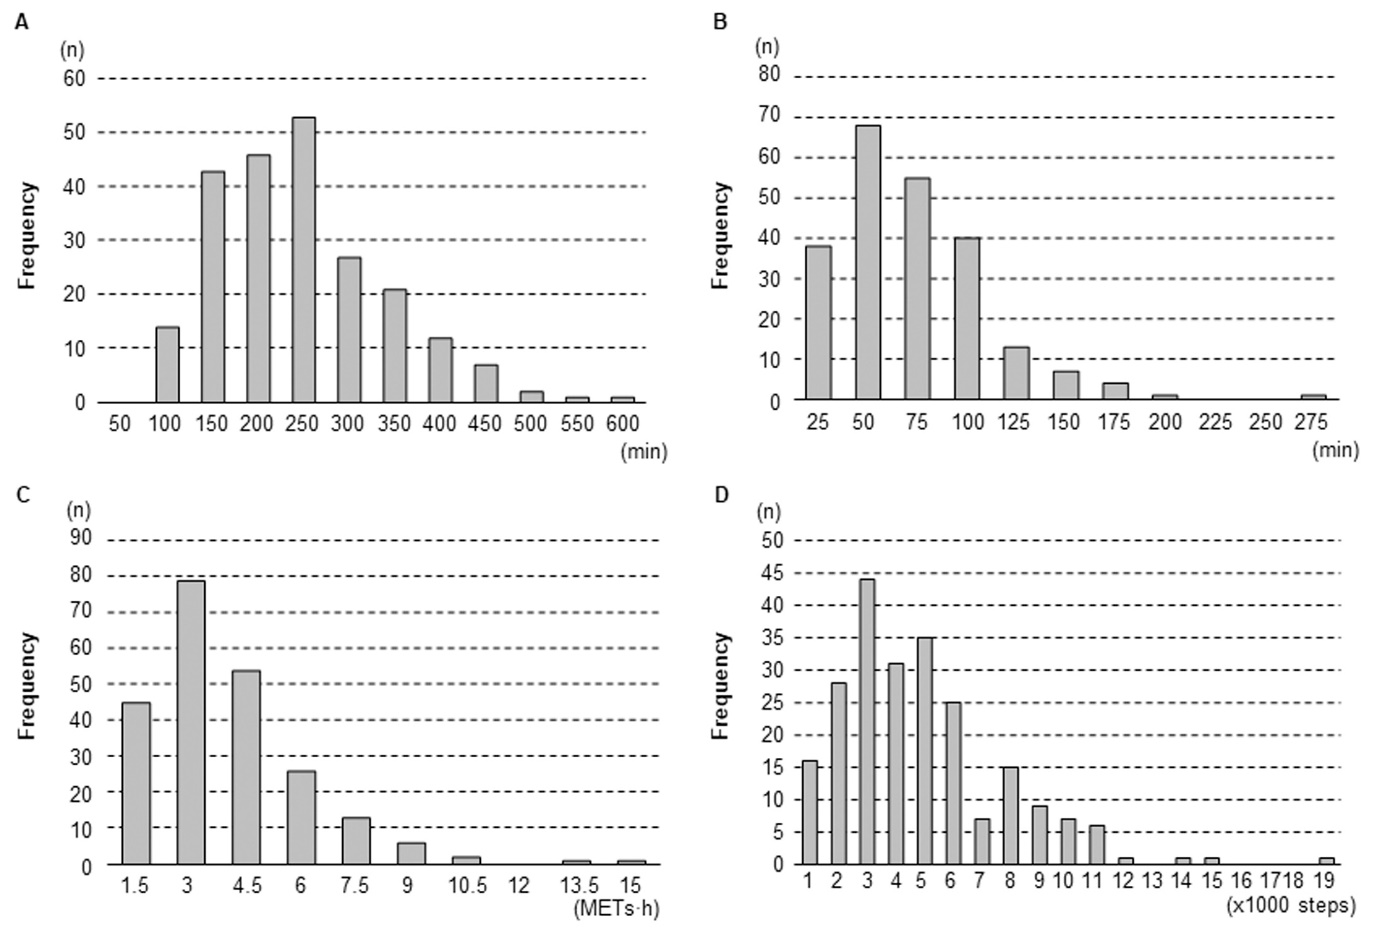


**Figure S2**


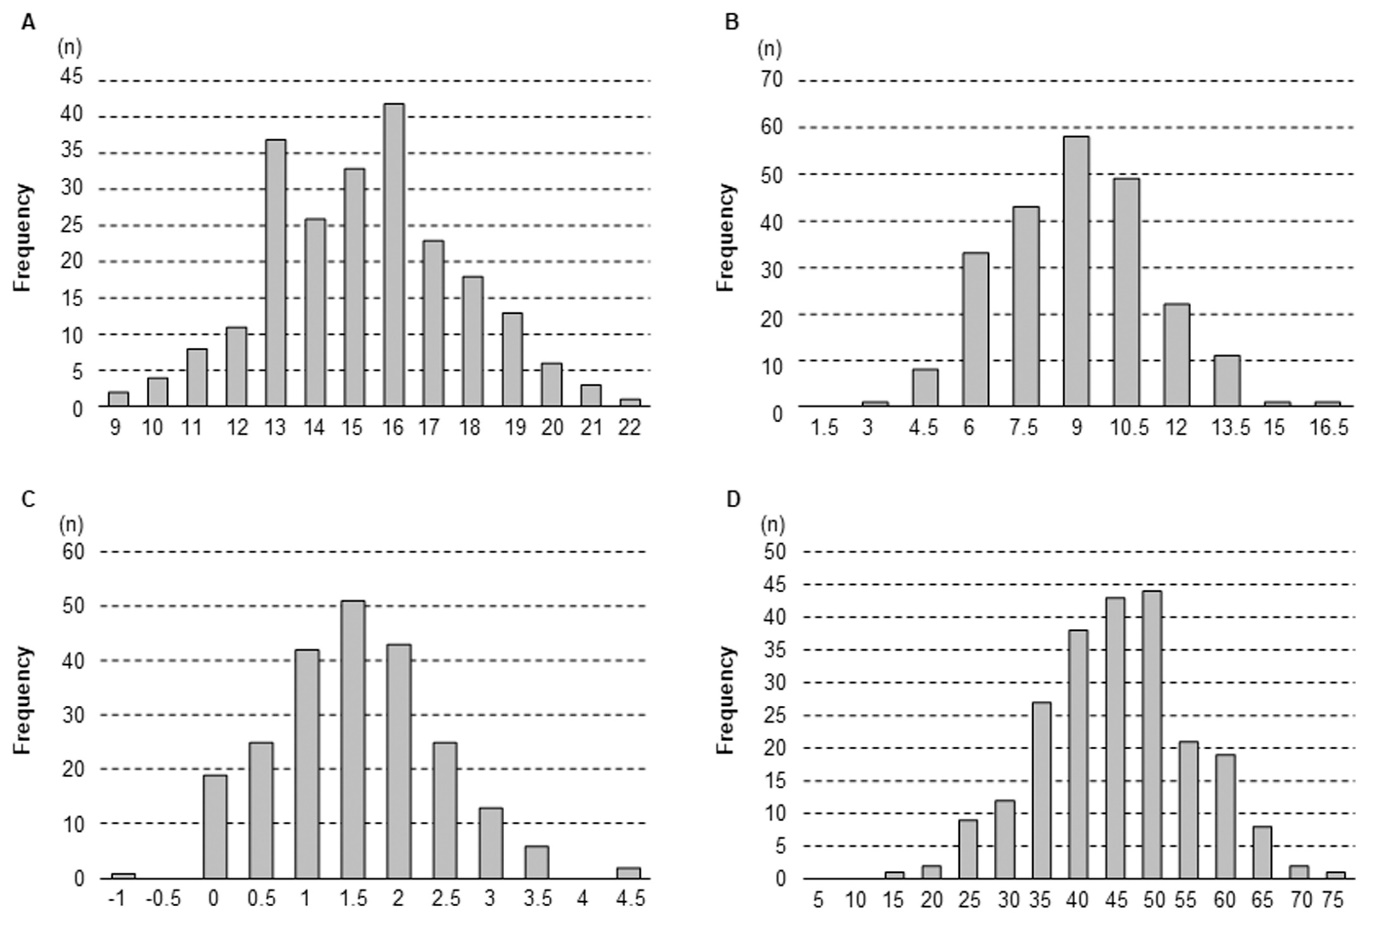

Supplement: Supplementary file 1 [file get_supplementary_file.php]
